# Supplementary material
Source: MDPI journal article supplement (https://www.mdpi.com/1999-4907/1/3/114)
Supplement: s1 [file s1]

## Sudden oak death-induced tanoak mortality in coast redwood forests: Current and predicted impacts to stand structure

Benjamin S. Ramage & Kevin L. O'Hara

### Supplementary Material

**Table S1.** Means, standard deviations, and significance classes for *observed* groups. Within each row, groups that do not share a letter were significantly different in Tukey's HSD tests. All analyses included second-growth plots only. "NN Diffs" = nearest neighbor differences.

|                                 | Healthy         | Diseased        | No-Tanoak       |
|---------------------------------|-----------------|-----------------|-----------------|
| Total Stems (# / ha)            | 595.5 ± 49.3 a  | 438.0 ± 72.8 a  | 442.5 ± 125.2 a |
| Total BA (m <sup>2</sup> / ha)  | 103.8 ± 10.7 ab | 69.3 ± 14.2 a   | 145.7 ± 37.8 b  |
| Mean DBH (cm)                   | 38.5 ± 4.0 a    | 37.0 ± 6.7 a    | 54.3 ± 16.0 a   |
| Mean Height (m)                 | 26.7 ± 4.7 a    | 24.9 ± 6.5 a    | 36.7 ± 14.4 a   |
| Mean HLC (m)                    | 14.1 ± 2.7 a    | 13.7 ± 3.4 a    | 19.9 ± 9.3 a    |
| Mean Crown Length (m)           | 12.6 ± 2.4 a    | 11.2 ± 3.3 a    | 16.8 ± 5.4 a    |
| Mean Crown Ratio                | 0.458 ± 0.040 a | 0.447 ± 0.032 a | 0.450 ± 0.072 a |
| Mean NN Diffs: DBH (cm)         | 23.8 ± 3.0 a    | 25.8 ± 3.0 a    | 37.5 ± 5.1 b    |
| Mean NN Diffs: Height (m)       | 11.9 ± 2.5 a    | 12.8 ± 4.0 a    | 16.2 ± 3.9 a    |
| Mean NN Diffs: HLC (m)          | 6.1 ± 1.0 a     | 7.2 ± 2.9 a     | 9.0 ± 3.9 a     |
| Mean NN Diffs: Crown Length (m) | 7.3 ± 2.0 a     | 7.4 ± 2.6 a     | 11.2 ± 2.8 a    |
| Mean NN Diffs: Crown Ratio      | 0.130 ± 0.025 a | 0.157 ± 0.015 a | 0.153 ± 0.017 a |
| C&E Aggregation Index           | 0.93 ± 0.05 a   | 0.69 ± 0.12 b   | 0.83 ± 0.06 ab  |

**Table S2.** Means, standard deviations, and significance classes for *inferred* groups. Within each row, groups that do not share a letter were significantly different in Tukey's HSD tests. All analyses included second-growth plots only. "NN Diffs" = nearest neighbor differences.

|                                 | 0% mortality    | 100% mortality  | No-Tanoak       |
|---------------------------------|-----------------|-----------------|-----------------|
| Total Stems (# / ha)            | 724.3 ± 192.6 a | 286.3 ± 82.0 b  | 442.5 ± 125.2 b |
| Total BA (m <sup>2</sup> / ha)  | 99.0 ± 13.2 a   | 75.3 ± 15.7 a   | 145.7 ± 37.8 b  |
| Mean DBH (cm)                   | 34.8 ± 5.3 a    | 50.8 ± 11.9 b   | 54.3 ± 16.0 b   |
| Mean Height (m)                 | 24.8 ± 4.6 a    | 30.5 ± 7.3 a    | 36.7 ± 14.4 a   |
| Mean HLC (m)                    | 13.3 ± 2.3 a    | 15.9 ± 4.0 a    | 19.9 ± 9.3 a    |
| Mean Crown Length (m)           | 11.5 ± 2.4 a    | 14.6 ± 3.9 a    | 16.8 ± 5.4 a    |
| Mean Crown Ratio                | 0.451 ± 0.025 a | 0.459 ± 0.046 a | 0.450 ± 0.072 a |
| Mean NN Diffs: DBH (cm)         | 20.9 ± 3.2 a    | 33.5 ± 11.2 b   | 37.5 ± 5.1 b    |
| Mean NN Diffs: Height (m)       | 10.8 ± 2.6 a    | 14.2 ± 3.3 ab   | 16.2 ± 3.9 b    |
| Mean NN Diffs: HLC (m)          | 5.8 ± 1.5 a     | 6.5 ± 2.3 a     | 9.0 ± 3.9 a     |
| Mean NN Diffs: Crown Length (m) | 6.4 ± 2.0 a     | 9.2 ± 2.5 ab    | 11.2 ± 2.8 b    |
| Mean NN Diffs: Crown Ratio      | 0.120 ± 0.022 a | 0.149 ± 0.032 a | 0.153 ± 0.017 a |
| C&E Aggregation Index           | 0.86 ± 0.11 a   | 0.60 ± 0.20 b   | 0.83 ± 0.06 ab  |

**Table S3.** Means, standard deviations, and significance levels for *predicted* intra-plot changes. P-values are from one-sample t-tests assessing whether intra-plot differences (between 0% and 100% tanoak mortality), collectively, were significantly different from zero. All analyses included second-growth plots only. “NN Diffs” = nearest neighbor differences.

|                                 | Predicted intra-plot difference:<br>(100% - 0% mortality) | p-value |
|---------------------------------|-----------------------------------------------------------|---------|
| Total Stems (# / ha)            | -438.0 $\pm$ 192.0                                        | 0.001   |
| Total BA (m <sup>2</sup> / ha)  | -23.8 $\pm$ 12.3                                          | 0.002   |
| Mean DBH (cm)                   | 16.0 $\pm$ 10.2                                           | 0.006   |
| Mean Height (m)                 | 5.7 $\pm$ 3.9                                             | 0.009   |
| Mean HLC (m)                    | 2.6 $\pm$ 2.1                                             | 0.016   |
| Mean Crown Length (m)           | 3.1 $\pm$ 2.5                                             | 0.019   |
| Mean Crown Ratio                | 0.007 $\pm$ 0.038                                         | 0.634   |
| Mean NN Diffs: DBH (cm)         | 12.6 $\pm$ 10.2                                           | 0.017   |
| Mean NN Diffs: Height (m)       | 3.4 $\pm$ 2.2                                             | 0.006   |
| Mean NN Diffs: HLC (m)          | 0.68 $\pm$ 1.82                                           | 0.363   |
| Mean NN Diffs: Crown Length (m) | 2.9 $\pm$ 2.0                                             | 0.010   |
| Mean NN Diffs: Crown Ratio      | 0.03 $\pm$ 0.04                                           | 0.097   |
| C&E Aggregation Index           | -0.26 $\pm$ 0.17                                          | 0.008   |
